# Supplementary material for: Hyperbaric Oxygen Therapy to Treat Diabetes Impaired Wound Healing in Rats
Source: PLoS One. 2014 Oct 15;9(10):e108533. doi: 10.1371/journal.pone.0108533 (PMC4198078; doi:10.1371/journal.pone.0108533)
Supplement: Data S2 — Repeatability and reliability of the O2C apparatus. (XLS) [file pone.0108533.s002.xls]

## Sheet: 3 min measurement
Measuring during 3 minutes
Raw data
The O2C generates a value every second
Time (s)	SO2 P1S	rHb P1S	Flow P1S
0	16	27	42
1	16	27	37
2	16	27	43
3	16	27	53
4	16	27	47
5	16	27	40
6	16	27	41
7	16	27	43
8	16	27	57
9	16	28	44
10	16	27	63
11	16	27	37
12	16	27	37
13	16	27	41
14	16	27	45
15	16	27	37
16	16	28	43
17	16	27	40
18	16	27	57
19	16	27	43
20	16	27	40
21	16	27	41
22	16	27	42
23	16	27	33
24	16	28	49
25	15	28	36
26	16	28	40
27	16	28	44
28	16	28	57
29	16	27	38
30	16	28	39
31	16	27	42
32	16	27	43
33	16	27	33
34	16	28	39
35	16	28	40
36	16	28	38
37	16	28	41
38	16	28	43
39	16	28	45
40	16	28	39
41	16	28	38
42	16	28	44
43	16	28	39
44	16	28	38
45	16	28	44
46	16	28	34
47	16	28	52
48	16	28	38
49	16	28	35
50	15	29	42
51	16	28	35
52	16	28	41
53	16	28	41
54	15	28	41
55	16	28	41
56	16	28	39
57	17	28	41
58	16	28	44
59	16	29	38
60	16	29	45
61	16	28	43
62	15	29	41
63	15	29	40
64	16	28	52
65	16	29	40
66	16	29	50
67	15	28	35
68	15	28	54
69	16	29	36
70	15	29	45
71	16	28	45
72	16	29	39
73	16	29	39
74	16	29	47
75	16	29	38
76	16	29	42
77	16	28	49
78	16	29	39
79	16	28	40
80	16	28	45
81	16	28	47
82	16	29	44
83	16	29	37
84	16	29	45
85	15	29	53
86	16	29	51
87	15	29	44
88	16	29	45
89	16	29	42
90	16	28	43
91	16	29	42
92	16	29	40
93	16	29	43
94	15	29	39
95	16	29	53
96	15	29	42
97	16	29	47
98	15	29	48
99	15	29	40
100	16	29	38
101	16	29	48
102	15	29	43
103	16	29	46
104	16	29	71
105	16	29	43
106	16	29	53
107	16	29	41
108	15	30	49
109	15	29	41
110	15	29	45
111	16	29	47
112	15	30	40
113	15	29	50
114	15	29	41
115	15	29	43
116	15	29	55
117	15	29	45
118	15	29	47
119	15	29	43
120	15	29	39
121	15	29	41
122	15	29	45
123	15	29	43
124	15	29	44
125	16	30	44
126	15	29	49
127	15	29	55
128	15	29	48
129	15	29	46
130	15	29	51
131	15	29	47
132	15	30	47
133	15	29	46
134	16	29	47
135	15	29	50
136	15	29	56
137	15	29	44
138	16	29	51
139	15	29	45
140	15	29	44
141	14	29	59
142	15	30	46
143	15	30	48
144	15	30	43
145	15	29	43
146	15	29	48
147	15	29	48
148	15	29	52
149	15	29	43
150	15	29	61
151	15	29	47
152	15	29	65
153	15	29	53
154	15	30	47
155	16	29	44
156	15	30	66
157	15	30	49
158	14	30	51
159	15	29	48
160	15	30	46
161	15	30	55
162	15	29	47
163	15	30	47
164	15	30	47
165	15	30	54
166	16	29	49
167	15	30	50
168	15	30	52
169	15	30	65
170	15	30	46
171	15	30	51
172	15	30	46
173	15	30	49
174	15	30	53
175	15	30	51
176	15	30	60
177	15	30	70
178	15	30	51
179	15	30	42
180	15	30	64
181	15	30	57
182	15	30	50
183	15	30	55
Average	15.5326	28.6685	45.625
Stdev	0.532056	0.931469	6.96954

## Sheet: replacing the probe
	replacing the probe (on the same location)
	time (sec)	SO2 P1S	rHb P1S	Flow P1S
1	1	11	25	100			Overall data
	2	12	25	81
	3	12	25	79			SO2 P1S
	4	12	25	87			meting	1	2	3	4	5	6	7	8
	5	12	25	69			average	11.8889	12	13	12.1176	13	12.9444	10.4545	11.1154
	6	12	25	78			stdev	0.333333	0	0	0.332106	0.774597	0.416176	0.800433	0.515901
	7	12	25	89
	8	12	25	76
	9	12	25	80			rHb
	average	11.8889	25	82.1111			meting	1	2	3	4	5	6	7	8
	stdev	0.333333	0	8.89444			average	25	27.3077	30	26.1176	29.0476	30.2222	26.9091	24.4231
2	1	12	27	41			stdev	0	0.480384	0	0.332106	0.218218	0.427793	0.426401	1.70113
	2	12	28	41
	3	12	27	44
	4	12	27	37			Flow P1S
	5	12	27	47			meting	1	2	3	4	5	6	7	8
	6	12	27	43			average	82.1111	42.8462	57.4167	75.2941	48.1429	91.6111	68.5	59.9231
	7	12	28	44			stdev	8.89444	4.01759	6.52907	6.66863	5.78174	9.48149	3.23301	3.70862
	8	12	27	44
	9	12	27	37
	10	12	27	42
	11	12	27	40
	12	12	28	45
	13	12	28	52
	average	12	27.3077	42.8462
	stdev	0	0.480384	4.01759
3	1	13	30	54
	2	13	30	55
	3	13	30	55
	4	13	30	57
	5	13	30	53
	6	13	30	68
	7	13	30	68
	8	13	30	68
	9	13	30	52
	10	13	30	52
	11	13	30	53
	12	13	30	54
	average	13	30	57.4167
	stdev	0	0	6.52907
4	1	13	26	72
	2	12	26	68
	3	12	26	72
	4	12	26	74
	5	13	26	79
	6	12	26	76
	7	12	26	76
	8	12	26	76
	9	12	26	75
	10	12	26	87
	11	12	26	64
	12	12	26	90
	13	12	26	72
	14	12	27	69
	15	12	27	74
	16	12	26	72
	17	12	26	84
	average	12.1176	26.1176	75.2941
	stdev	0.332106	0.332106	6.66863
5	1	16	30	61
	2	12	29	47
	3	13	29	49
	4	13	29	42
	5	13	29	45
	6	13	29	41
	7	13	29	48
	8	13	29	46
	9	13	29	41
	10	13	29	53
	11	13	29	43
	12	12	29	57
	13	13	29	43
	14	13	29	60
	15	13	29	46
	16	13	29	49
	17	13	29	47
	18	13	29	44
	19	13	29	52
	20	13	29	51
	21	12	29	46
	average	13	29.0476	48.1429
	stdev	0.774597	0.218218	5.78174
6	1	12	30	105
	2	12	30	90
	3	13	30	94
	4	13	30	102
	5	14	30	94
	6	13	30	90
	7	13	30	89
	8	13	31	79
	9	13	31	93
	10	13	30	109
	11	13	30	88
	12	13	31	86
	13	13	30	86
	14	13	30	88
	15	13	30	77
	16	13	30	87
	17	13	30	82
	18	13	31	110
	average	12.9444	30.2222	91.6111
	stdev	0.416176	0.427793	9.48149
7	1	11	25	64
	2	11	27	71
	3	12	27	65
	4	12	27	69
	5	12	27	73
	6	12	27	67
	7	10	27	68
	8	10	27	65
	9	10	27	75
	10	10	27	68
	11	10	27	64
	12	10	27	68
	13	10	27	69
	14	10	27	67
	15	10	27	68
	16	10	27	72
	17	10	27	67
	18	10	27	74
	19	10	27	73
	20	10	27	65
	21	10	27	68
	22	10	27	67
	average	10.4545	26.9091	68.5
	stdev	0.800433	0.426401	3.23301
8	1	13	30	63
	2	12	27	58
	3	12	27	57
	4	11	26	57
	5	11	26	60
	6	11	25	62
	7	11	25	61
	8	11	25	63
	9	11	25	57
	10	11	25	60
	11	11	24	57
	12	10	24	71
	13	11	24	60
	14	11	24	58
	15	11	24	53
	16	11	24	53
	17	11	23	62
	18	11	23	63
	19	11	23	62
	20	11	23	62
	21	11	23	63
	22	11	23	63
	23	11	23	60
	24	11	23	57
	25	11	23	59
	26	11	23	57
	average	11.1154	24.4231	59.9231
	stdev	0.515901	1.70113	3.70862

## Sheet: calibration
Repeated measurement after recalibration of the O2C
number	SO2 P1S	rHb P1S	Flow P1S			SO2
1	15	35	55			number	1	2	3
2	15	34	48			Average	15.0263	11.5714	15.7222
3	15	35	52			stdev	0.162221	0.513553	0.460889
4	15	35	51
5	15	35	55			rHb
6	15	35	50			number	1	2	3
7	15	35	51			Average	35	27.1429	31
8	15	35	51			stdev	0.232495	0.363137	0
9	15	35	50
10	15	35	52			Flow
11	15	35	48			number	1	2	3
12	15	35	49			Average	51.0263	58.1429	54.7222
13	15	35	53			stdev	4.07688	4.11109	3.49463
14	15	35	48
15	15	35	52
16	15	35	57
17	15	35	49
18	15	35	52
19	15	35	54
20	15	35	50
21	16	35	55
22	15	35	50
23	15	35	50
24	15	35	57
25	15	35	48
26	15	35	48
27	15	35	48
28	15	35	45
29	15	35	47
30	15	35	49
31	15	35	45
32	15	35	47
33	15	35	47
34	15	35	57
35	15	35	47
36	15	35	52
37	15	35	54
38	15	36	66
Average	15.0263	35	51.0263
stdev	0.162221	0.232495	4.07688
41	11	27	54
42	12	27	63
43	11	27	59
44	12	27	58
45	11	27	66
46	12	27	53
47	12	27	58
48	12	27	59
49	11	27	61
50	12	27	55
51	12	27	62
52	12	27	56
53	11	28	51
54	11	28	59
Average	11.5714	27.1429	58.1429
stdev	0.513553	0.363137	4.11109
57	16	31	55
58	16	31	55
59	16	31	55
60	16	31	54
61	16	31	57
62	16	31	52
63	15	31	56
64	15	31	54
65	15	31	53
66	15	31	55
67	16	31	53
68	16	31	56
69	16	31	53
70	16	31	54
71	16	31	52
72	16	31	50
73	16	31	67
74	15	31	54
Average	15.7222	31	54.7222
stdev	0.460889	0	3.49463

## Sheet: Summary Validation data
Validation O2C measurements
Measurements done:
· 3 minute measurement
· Lifting the probe and replacing the probe on the same location. This was repeated 8 times.
· 3 measurements of 20 seconds each. After each measurement the white balance was corrected (ambient light remained the same)
	SO2 P1S
		3 min	lift probe 1	lift probe 2	lift probe 3	lift probe 4	lift probe 5	lift probe 6	lift probe 7	lift probe 8	cal 1	cal 2	cal 3
	Average	15.5326	11.8889	12	13	12.1176	13	12.9444	10.4545	11.1154	15.0263	11.5714	15.7222
	Stdev	0.532056	0.333333	0	0	0.332106	0.774597	0.416176	0.800433	0.515901	0.162221	0.513553	0.460889
	rHb
		3 min	lift probe 1	lift probe 2	lift probe 3	lift probe 4	lift probe 5	lift probe 6	lift probe 7	lift probe 8	cal 1	cal 2	cal 3
	Average	28.6685	25	27.3077	30	26.1176	29.0476	30.2222	26.9091	24.4231	35	27.1429	31
	Stdev	0.931469	0	0.480384	0	0.332106	0.218218	0.427793	0.426401	1.70113	0.232495	0.363137	0
	Flow P1S
		3 min	lift probe 1	lift probe 2	lift probe 3	lift probe 4	lift probe 5	lift probe 6	lift probe 7	lift probe 8	cal 1	cal 2	cal 3
	Average	45.625	82.1111	42.8462	57.4167	75.2941	48.1429	91.6111	68.5	59.9231	51.0263	58.1429	54.7222
	Stdev	6.96954	8.89444	4.01759	6.52907	6.66863	5.78174	9.48149	3.23301	3.70862	4.07688	4.11109	3.49463
